# Supplementary material
Source: Springer Nature journal article supplement (https://www.springermedizin.de/resource/supplementary/13046_2008_105_MOESM1_ESM.pdf/9661636)

**A**TNF- $\alpha$  (pg/ml)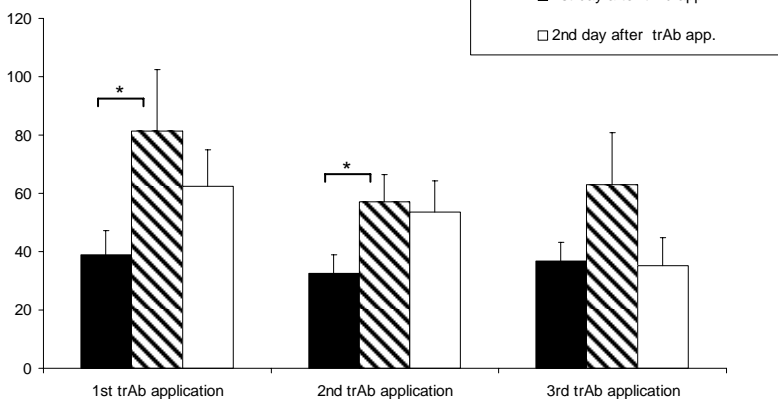**B**

sIL-2R (ng/ml)

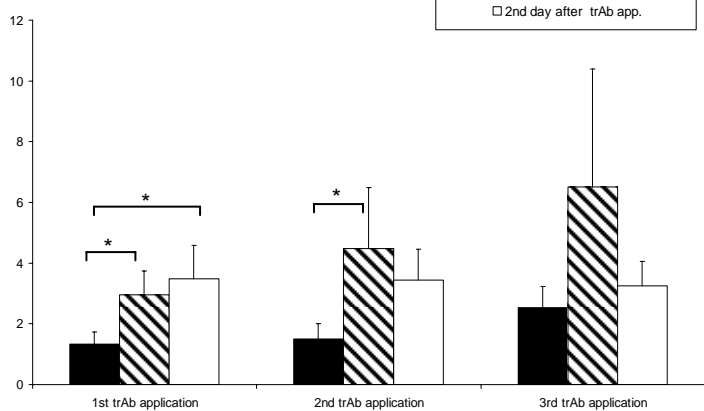**C**

Interleukin-6 (pg/ml)

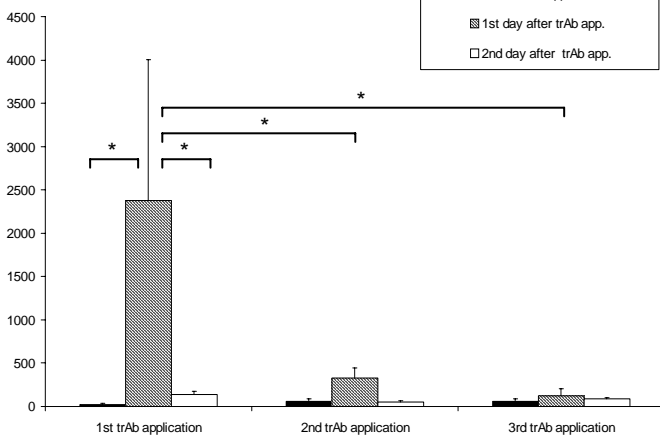

Supplement: MOESM1 [file 9661636]
